# Supplementary material
Source: PubMed Central journal article supplement (PMC7822111)
Supplement: ntaa162_suppl_supplementary_taxonomy_form.pdf [file ntaa162_suppl_supplementary_taxonomy_form.pdf]

## CRedit author statement

**Micheal Kofi Boachie:** Data curation, formal analysis, investigation, methodology, writing-original draft, writing-review & editing. **Laura Rossouw:** Conceptualization, investigation, methodology, project administration, supervision, writing-original draft, writing-review draft. **Hana Ross:** Conceptualization, funding acquisition, supervision.
